# Supplementary material for: Molecular Detection of the Seed-Borne Pathogen Colletotrichum lupini Targeting the Hyper-Variable IGS Region of the Ribosomal Cluster
Source: MDPI journal article supplement (doi:10.3390/plants8070222), 2019-07-14
Supplement: s1 [file s1]

CLF

|                               |            |            |            |            |            |              |           |            |             |
|-------------------------------|------------|------------|------------|------------|------------|--------------|-----------|------------|-------------|
| <i>C. lupini</i> RB221        | CCCGAGAGG  | CTCCAGTAT  | CCTAGAACAG | CT-----    | -----      | -----CCCCAGG | TACCCAGAA | CACGT-AGAC | CAGGTACCOCT |
| <i>C. lupini</i> RB173        | CCCGAGAGG  | CTCCAGTAT  | CCTAGAACAG | CT-----    | -----      | -----CCCCAGG | TACCCAGAA | CACGT-AGAC | CAGGTACCOCT |
| <i>C. tamarilloi</i> RB018    | CCCAAGACCG | CCCCAGGTAC | CCTAGAGCAG | ACG-----   | -----      | -----CCCCAGG | TACCCAGAA | CACGT-AGAC | CAGGTACCOCT |
| <i>C. nymphaeae</i> RB190     | CCCAAGACCG | CCCCAGGTAC | CCTAGAGCAG | GTGTCGCCAG | CCGCCCAAGA | CCGCCCCAGG   | TACCCAGAA | CAGGT-ACAC | CAGGTACCOCT |
| <i>C. costaricensis</i> RB184 | CCCGAGAGG  | CCCCAGGTAC | CCTAGAACAG | ACG-----   | -----      | -----CCCCAGG | TACCCAGAA | CAGGT-CC-C | CAGGTACCOCT |
| <i>C. abscissum</i> RB197     | TAGAACAGCT | CACCAGGTAC | CCTAGAGCAG | GTGCCGCCAG | CTCCCAAGA  | CCGCCCCAGG   | TACCCAGAG | CAGGTGCTGC | CAGGTACCOCT |
| <i>C. simmondsii</i> RB179    | TAGAGCAAGT | CCCCAGGTAC | CCTAGAGCAG | GCACGCCAAA | CACCCCAAGG | CCGCCCCAGG   | TACCCAGAA | CAGGT-ACAC | TAGGTACCOCT |

|                               |            |            |            |            |            |          |            |            |            |
|-------------------------------|------------|------------|------------|------------|------------|----------|------------|------------|------------|
| <i>C. lupini</i> RB221        | AGAGCAAGCG | CTATAAGGGC | CCTAGGGCOG | GCCTAAATAG | CTTAAAGCGA | AGC----- | ---CCTA-GG | CATTATAAAA | AGCGGTCCGA |
| <i>C. lupini</i> RB173        | AGAGCAAGCG | CTATAAGGGC | CCTAGGGCOG | GCCTAAATAG | CTTAAAGCGA | AGC----- | ---CCTA-GG | TATTATAAAA | AGCGGTCCGA |
| <i>C. tamarilloi</i> RB018    | AGAGCAAGCG | CTATAAGGGC | CCTAGGGCOG | GCCTAAATAG | CTTAAAGCGA | AGC----- | ---CCTA-GG | TATTATAAAA | AGCGGTCCGA |
| <i>C. nymphaeae</i> RB190     | AGAGCAAGCG | CTATAAGGGC | CCTAGGGCOG | GCCTAAATAG | CTTAAAGCGA | AGC----- | ---CCTA-GG | TATTATAAAA | AGCGGTCCGA |
| <i>C. costaricensis</i> RB184 | AGAGCAAGCG | CTATAAGGGC | CCTAGGGCOG | GCCTAAATAG | CTTAAAGCGA | AGC----- | ---CCTA-GG | TATTATAAAA | AGCGGTCCGA |
| <i>C. abscissum</i> RB197     | AGAGCAAGCG | CTATAAGGGC | CCTAGGGCOG | GCCTAAATAG | CTTAAAGCGA | AGC----- | ---CCTA-GG | TATTATAAAA | AGCGGTCCGA |
| <i>C. simmondsii</i> RB179    | AGAGCAAGCG | CTATAAGGGC | CCTAGGGCOG | GCCTAAATAG | CTTAAAGCGA | AGC----- | ---CCTA-GG | TATTATAAAA | AGCGGTCCGA |

|                               |            |             |            |            |            |            |           |            |             |
|-------------------------------|------------|-------------|------------|------------|------------|------------|-----------|------------|-------------|
| <i>C. lupini</i> RB221        | GGGCCTAGGT | ACCCCTAGAAG | AGAACTTGGT | AAGAATAAAT | AAGATTATTC | GGGAAATAAA | AACCTGAAC | CGTACTGAGT | ATGAGGTAAAT |
| <i>C. lupini</i> RB173        | GGGCCTAGGT | ACCCCTAGAAG | AGAACTTGGT | AAGAATAAAT | AAGATTATTC | GGGAAATAAA | AACCTGAAC | CGTACTGAGT | ATGAGGTAAAT |
| <i>C. tamarilloi</i> RB018    | GGGCCTAGGT | ACCCCTAGAAG | AGAACTTGGT | AAGAATAAAT | AAGATTATTC | GGGAAATAAA | AACCTGAAC | CGTACTGAGT | ATGAGGTAAAT |
| <i>C. nymphaeae</i> RB190     | GGGCCTAGGT | ACCCCTAGAAG | AGAACTTGGT | AAGAATAAAT | AAGATTATTC | GGGAAATAAA | AACCTGAAC | CGTACTGAGT | ATGAGGTAAAT |
| <i>C. costaricensis</i> RB184 | GGGCCTAGGT | ACCCCTAGAAG | AGAACTTGGT | AAGAATAAAT | AAGATTATTC | GGGAAATAAA | AACCTGAAC | CGTACTGAGT | ATGAGGTAAAT |
| <i>C. abscissum</i> RB197     | GGGCCTAGGT | ACCCCTAGAAG | AGAACTTGGT | AAGAATAAAT | AAGATTATTC | GGGAAATAAA | AACCTGAAC | CGTACTGAGT | ATGAGGTAAAT |
| <i>C. simmondsii</i> RB179    | GGGCCTAGGT | ACCCCTAGAAG | AGAACTTGGT | AAGAATAAAT | AAGATTATTC | GGGAAATAAA | AACCTGAAC | CGTACTGAGT | ATGAGGTAAAT |

|                               |            |            |            |            |            |            |            |            |            |
|-------------------------------|------------|------------|------------|------------|------------|------------|------------|------------|------------|
| <i>C. lupini</i> RB221        | ACGTCGATTT | TAACCTGGAA | TGGTTGTAGA | AGATAAGTAC | GTTTATACCT | TTCTAGGGTA | CGAAAAACGG | AATTTAATAA | TAAAAAGCTA |
| <i>C. lupini</i> RB173        | ACGTCGATTT | TAACCTGGAA | TGGTTGTAGA | AGATAAGTAC | GTTTATACCT | TTCTAGGGTA | CGAAAAACGG | AATTTAATAA | TAAAAAGCTA |
| <i>C. tamarilloi</i> RB018    | ACGTCGATTT | TAACCTGGAA | TGGTTGTAGA | AGATAAGTAC | GTTTATACCT | TTCTAGGGTA | CGAAAAACGG | AATTTAATAA | TAAAAAGCTA |
| <i>C. nymphaeae</i> RB190     | ACGTCGATTT | TAACCTGGAA | TGGTTGTAGA | AGATAAGTAC | GTTTATACCT | TTCTAGGGTA | CGAAAAACGG | AATTTAATAA | TAAAAAGCTA |
| <i>C. costaricensis</i> RB184 | ACGTCGATTT | TAACCTGGAA | TGGTTGTAGA | AGATAAGTAC | GTTTATACCT | TTCTAGGGTA | CGAAAAACGG | AATTTAATAA | TAAAAAGCTA |
| <i>C. abscissum</i> RB197     | ACGTCGATTT | TAACCTGGAA | TGGTTGTAGA | AGATAAGTAC | GTTTATACCT | TTCTAGGGTA | CGAAAAACGG | AATTTAATAA | TAAAAAGCTA |
| <i>C. simmondsii</i> RB179    | ACGTCGATTT | TAACCTGGAA | TGGTTGTAGA | AGATAAGTAC | GTTTATACCT | TTCTAGGGTA | CGAAAAACGG | AATTTAATAA | TAAAAAGCTA |

|                               |            |            |            |            |            |            |            |            |            |
|-------------------------------|------------|------------|------------|------------|------------|------------|------------|------------|------------|
| <i>C. lupini</i> RB221        | GGTAGAGCGT | TCTTAATTAG | ATAGGGGAGT | TTTATTTTTT | ATATATTATA | GTACTACGCT | TTATAAGAAC | TTTATAATAC | AAGAGTATGA |
| <i>C. lupini</i> RB173        | GGTAGAGCGT | TCTTAATTAG | ATAGGGGAGT | TTTATTTTTT | ATATATTATA | GTACTACGCT | TTATAAGAAC | TTTATAATAC | AAGAGTATGA |
| <i>C. tamarilloi</i> RB018    | GATAGAGCGT | TCTTTGTTAG | ATAGGGGAGT | TTTATTTTTT | ATATATTATA | GTACTACGCT | TTATAAGAAC | TTTATAATAC | AAGAGTATGA |
| <i>C. nymphaeae</i> RB190     | ATGTTGATCT | TGACTTGGAG | TAAGTACAGT | TTTATTTTTT | ATATATTATA | GTACTACGCT | TTATAAGAAC | TTTATAATAC | AAGAGTATGA |
| <i>C. costaricensis</i> RB184 | GGTAGAGCGT | TCTTTGTTAG | ATAGGGGAGT | TTTATTTTTT | ATATATTATA | GTACTACGCT | TTATAAGAAC | TTTATAATAC | AAGAGTATGA |
| <i>C. abscissum</i> RB197     | GGTAGAGCGT | TCTTTGTTAG | ATAGGGGAGT | TTTATTTTTT | ATATATTATA | GTACTACGCT | TTATAAGAAC | TTTATAATAC | AAGAGTATGA |
| <i>C. simmondsii</i> RB179    | GATGAGCGT  | TTTATAATAG | ATGGGGGAGT | TTTATTTTTT | ATATATTATA | GTACTACGCT | TTATAAGAAC | TTTATAATAC | AAGAGTATGA |

|                               |            |            |           |            |            |            |            |            |           |
|-------------------------------|------------|------------|-----------|------------|------------|------------|------------|------------|-----------|
| <i>C. lupini</i> RB221        | AAAAAGAAGG | AAAAAATAG- | -----AAAA | CTACTACGTA | AGTTCATAAT | GAAGTATACA | AACAATATAT | TTAGAGCTTT | TATAAAGGA |
| <i>C. lupini</i> RB173        | AAAAAGAAGG | AAAAAATAG- | -----AAAA | CTACTACGTA | AGTTCATAAT | GAAGTATACA | AACAATATAT | TTAGAGCTTT | TATAAAGGA |
| <i>C. tamarilloi</i> RB018    | AAAAAGAAGG | AAAAAATAG- | -----AAAA | CTACTACGTA | AGTTCATAAT | GAAGTATACA | AACAATATAT | TTAGAGCTTT | TATAAAGGA |
| <i>C. nymphaeae</i> RB190     | AAAAAGAAGG | AAAAAATAG- | -----AAAA | CTACTACGTA | AGTTCATAAT | GAAGTATACA | AACAATATAT | TTAGAGCTTT | TATAAAGGA |
| <i>C. costaricensis</i> RB184 | AAAAAGAAGG | AAAAAATAG- | -----AAAA | CTACTACGTA | AGTTCATAAT | GAAGTATACA | AACAATATAT | TTAGAGCTTT | TATAAAGGA |
| <i>C. abscissum</i> RB197     | AAAAAGAAGG | AAAAAATAG- | -----AAAA | CTACTACGTA | AGTTCATAAT | GAAGTATACA | AACAATATAT | TTAGAGCTTT | TATAAAGGA |
| <i>C. simmondsii</i> RB179    | AAGGAAGGA  | AAAAAATAG- | -----AAAA | CTACTACGTA | AGTTCATAAT | GAAGTATACA | AACAATATAT | TTAGAGCTTT | TATAAAGGA |

|                               |            |            |            |            |            |            |            |            |            |
|-------------------------------|------------|------------|------------|------------|------------|------------|------------|------------|------------|
| <i>C. lupini</i> RB221        | ATTTCATACT | AGCTATTAAA | GCTTTTATA  | TGAGTATAC  | G-----     | -----      | -----GAA   | CAAGTATATA | TAATAAAGG  |
| <i>C. lupini</i> RB173        | ATTTCATACT | AGCTATTAAA | GCTTTTATA  | TGAGTATAC  | G-----     | -----      | -----GAA   | CAAGTATATA | TAATAAAGG  |
| <i>C. tamarilloi</i> RB018    | GTTTAATACT | AGTTATCAAA | GCTTTTATA  | TCAAGCATAT | A-----     | -----      | -----GAA   | TAAGTATATA | TAATAGATAG |
| <i>C. nymphaeae</i> RB190     | ACTTAAACT  | AGACTTCGAA | ACTTTTCATA | CTAAGCATAT | AGATATTACT | A-----     | -----GAA   | TAAGTATATA | TAATAGATAG |
| <i>C. costaricensis</i> RB184 | ATTTAATACT | AATTTACTAA | GCTTTTATA  | TAAAGTATAT | AAATACTAAT | ATTATTTAAA | AAAAAGAGAA | TAAATATATA | TAATAAAGG  |
| <i>C. abscissum</i> RB197     | ATTAAATATT | AATTTACTAA | GCTTTTATA  | TAAAGTATAT | AAATACTAAT | ATTATTTAAA | AAAAAGAGAA | TAAATATATA | TAATAAAGG  |
| <i>C. simmondsii</i> RB179    | ATTTAATACT | AAACCTCAAA | ACTTTTCATA | GTAAGTATAT | AAGTATTGTT | A-----     | -----GAA   | TAAGTATATA | TAATAAAGG  |

|                               |            |            |            |            |            |            |           |            |           |
|-------------------------------|------------|------------|------------|------------|------------|------------|-----------|------------|-----------|
| <i>C. lupini</i> RB221        | ATTATAATAG | TAAAAACGGA | GTTTCTCAAG | TGATTTTTGA | ATATTAGTAA | AGTATAGAGC | TGATTCTAG | ACTAGAAGCT | TAATAAAGG |
| <i>C. lupini</i> RB173        | ATTATAATAG | TAAAAACGGA | GTTTCTCAAG | TGATTTTTGA | ATATTAGTAA | AGTATAGAGC | TGATTCTAG | ACTAGAAGCT | TAATAAAGG |
| <i>C. tamarilloi</i> RB018    | ATTATAATAG | TAAAAACGGA | GTTTCTCAAG | TGATTTTTGA | ATATTAGTAA | AGTATAGAGC | TGATTCTAG | ACTAGAAGCT | TAATAAAGG |
| <i>C. nymphaeae</i> RB190     | ATTATAATAG | TAAAAACGGA | GTTTCTCAAG | TGATTTTTGA | ATATTAGTAA | AGTATAGAGC | TGATTCTAG | ACTAGAAGCT | TAATAAAGG |
| <i>C. costaricensis</i> RB184 | ATTATAATAG | TAAAAACGGA | GTTTCTCAAG | TGATTTTTGA | ATATTAGTAA | AGTATAGAGC | TGATTCTAG | ACTAGAAGCT | TAATAAAGG |
| <i>C. abscissum</i> RB197     | ATTATAATAG | TAAAAACGGA | GTTTCTCAAG | TGATTTTTGA | ATATTAGTAA | AGTATAGAGC | TGATTCTAG | ACTAGAAGCT | TAATAAAGG |
| <i>C. simmondsii</i> RB179    | ATCATAGCAA | TAAAGACGAG | GTTTCTCAAG | TGATTTTTGA | ATATTAGTAA | AGTATAGAGC | TGATTCTAG | ACTAGAAGCT | TAATAAAGG |

|                               |            |            |            |            |            |             |             |            |    |
|-------------------------------|------------|------------|------------|------------|------------|-------------|-------------|------------|----|
| <i>C. lupini</i> RB221        | TTTCTTTAAA | AGTATAATGT | TAAATATGTA | GAATTAGGCT | AGTGGTACTT | TAGAAATGGAC | GCCTATAAACG | CCTAAGAACG | GC |
| <i>C. lupini</i> RB173        | TTTCTTTAAA | AGTATAATGT | TAAATATGTA | GAATTAGGCT | AGTGGTACTT | TAGAAATGGAC | GCCTATAAACG | CCTAAGAACG | GC |
| <i>C. tamarilloi</i> RB018    | TTTCTTTAAA | AGTATAATGT | TAAATATGTA | GAATTAGGCT | AGTGGTACTT | TAGAAATGGAC | GCCTATAAACG | CCTAAGAACG | GC |
| <i>C. nymphaeae</i> RB190     | TTTCTTTAAA | AGTATAATGT | TAAATATGTA | GAATTAGGCT | AGTGGTACTT | TAGAAATGGAC | GCCTATAAACG | CCTAAGAACG | GC |
| <i>C. costaricensis</i> RB184 | TTTCTTTAAA | AGTATAATGT | TAAATATGTA | GAATTAGGCT | AGTGGTACTT | TAGAAATGGAC | GCCTATAAACG | CCTAAGAACG | GC |
| <i>C. abscissum</i> RB197     | TTTCTTTAAA | AGTATAATGT | TAAATATGTA | GAATTAGGCT | AGTGGTACTT | TAGAAATGGAC | GCCTATAAACG | CCTAAGAACG | GC |
| <i>C. simmondsii</i> RB179    | TTTCTTTAAA | AGTATAATGT | TAAATATGTA | GAATTAGGCT | AGTGGTACTT | TAGAAATGGAC | GCCTATAAACG | CCTAAGAACG | GC |

CLR
