# Supplementary material for: Molecular Detection of the Seed-Borne Pathogen Colletotrichum lupini Targeting the Hyper-Variable IGS Region of the Ribosomal Cluster
Source: MDPI journal article supplement (doi:10.3390/plants8070222), 2019-07-14
Supplement: s1 [file s1]

**Table S1.** DNA concentrations and absorbance ratios of *Lupinus* spp. seed batches artificially infected with *Colletotrichum lupini* IMI504893

| Batch   | Species                 | Cultivar   | DNA $\mu\text{g } \mu\text{L}^{-1}$ * | $A_{260}/A_{280}$ ** | $A_{260}/A_{230}$ ** |
|---------|-------------------------|------------|---------------------------------------|----------------------|----------------------|
| 1:10    | <i>L. albus</i>         | Multitalia | 32.8                                  | 1.78                 | 2.21                 |
|         | <i>L. luteus</i>        | Mister     | 30.1                                  | 1.78                 | 2.25                 |
|         | <i>L. angustifolius</i> | Tango      | 36.3                                  | 1.77                 | 2.2                  |
| 1:100   | <i>L. albus</i>         | Multitalia | 45.4                                  | 1.93                 | 1.78                 |
|         | <i>L. luteus</i>        | Mister     | 10.6                                  | 1.86                 | 1.98                 |
|         | <i>L. angustifolius</i> | Tango      | 1.69                                  | 2.2                  | 1.85                 |
| 1:1000  | <i>L. albus</i>         | Multitalia | 20.3                                  | 1.9                  | 2.24                 |
|         | <i>L. luteus</i>        | Mister     | 72.1                                  | 2.01                 | 2.28                 |
|         | <i>L. angustifolius</i> | Tango      | 122                                   | 1.8                  | 2.28                 |
| 1:10000 | <i>L. albus</i>         | Multitalia | 19.1                                  | 1.63                 | 1.82                 |
|         | <i>L. luteus</i>        | Mister     | 44.7                                  | 1.87                 | 2.04                 |
|         | <i>L. angustifolius</i> | Tango      | 73.4                                  | 1.83                 | 1.8                  |

\*To determine the concentration of the DNA solution a Qubit™ fluorometer (Invitrogen) was used according to manufacturer's protocols.

\*\* Absorbances were estimated by a GeneQuant II spectrophotometer (Pharmacia Biotech, Cambridge, UK).
