# Supplementary figures and images for: Molecular Detection of the Seed-Borne Pathogen Colletotrichum lupini Targeting the Hyper-Variable IGS Region of the Ribosomal Cluster
Source: MDPI journal article supplement (doi:10.3390/plants8070222), 2019-07-14

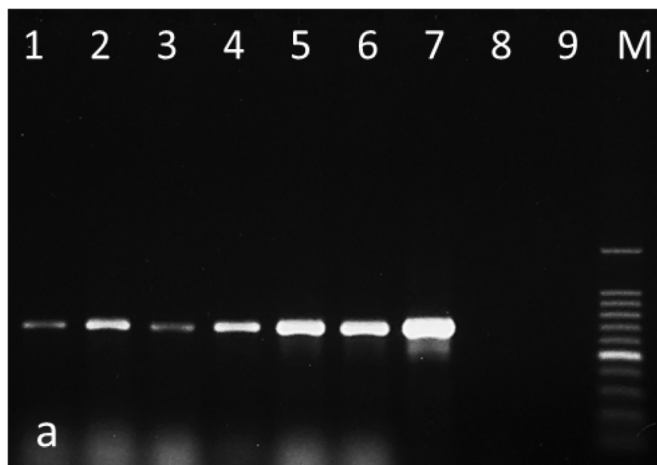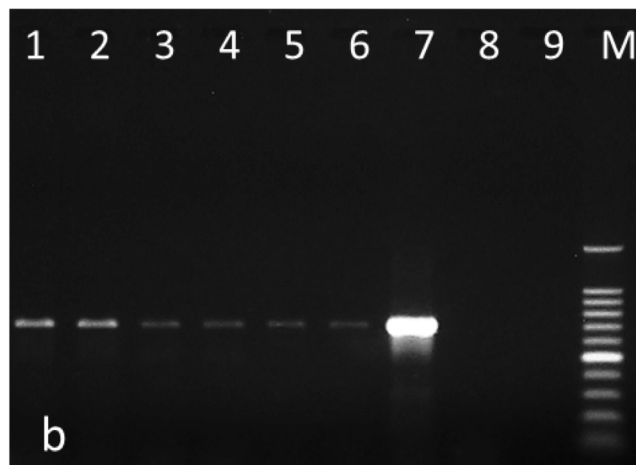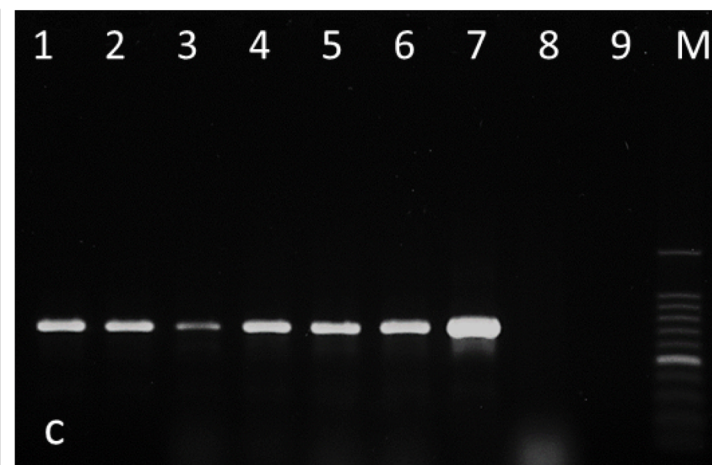

Supplement: s1 [file s1]

500 bp -

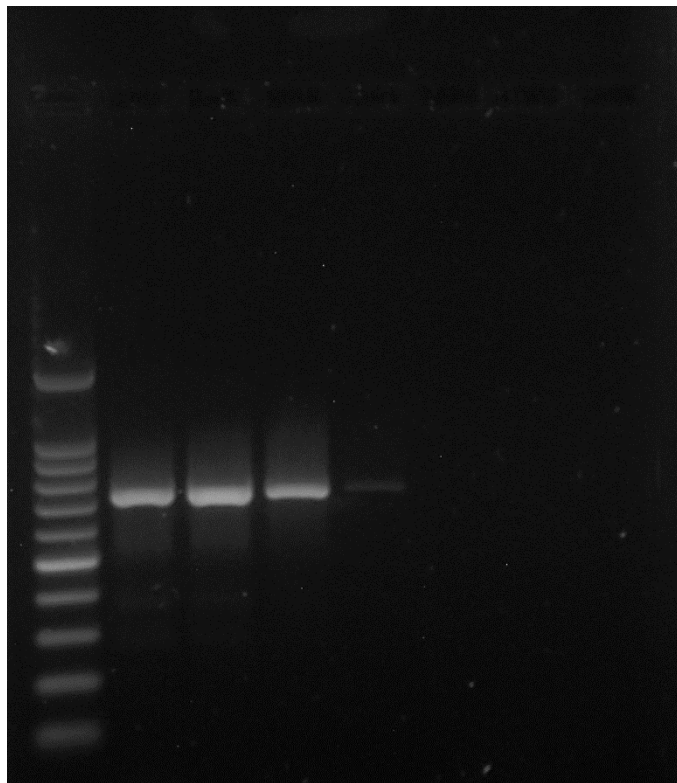

MARKER

10 ng

1 ng

0.1 ng

0.01 ng

0.001 ng

0.0001 ng

Negative ctrl

Supplement: s1 [file s1]

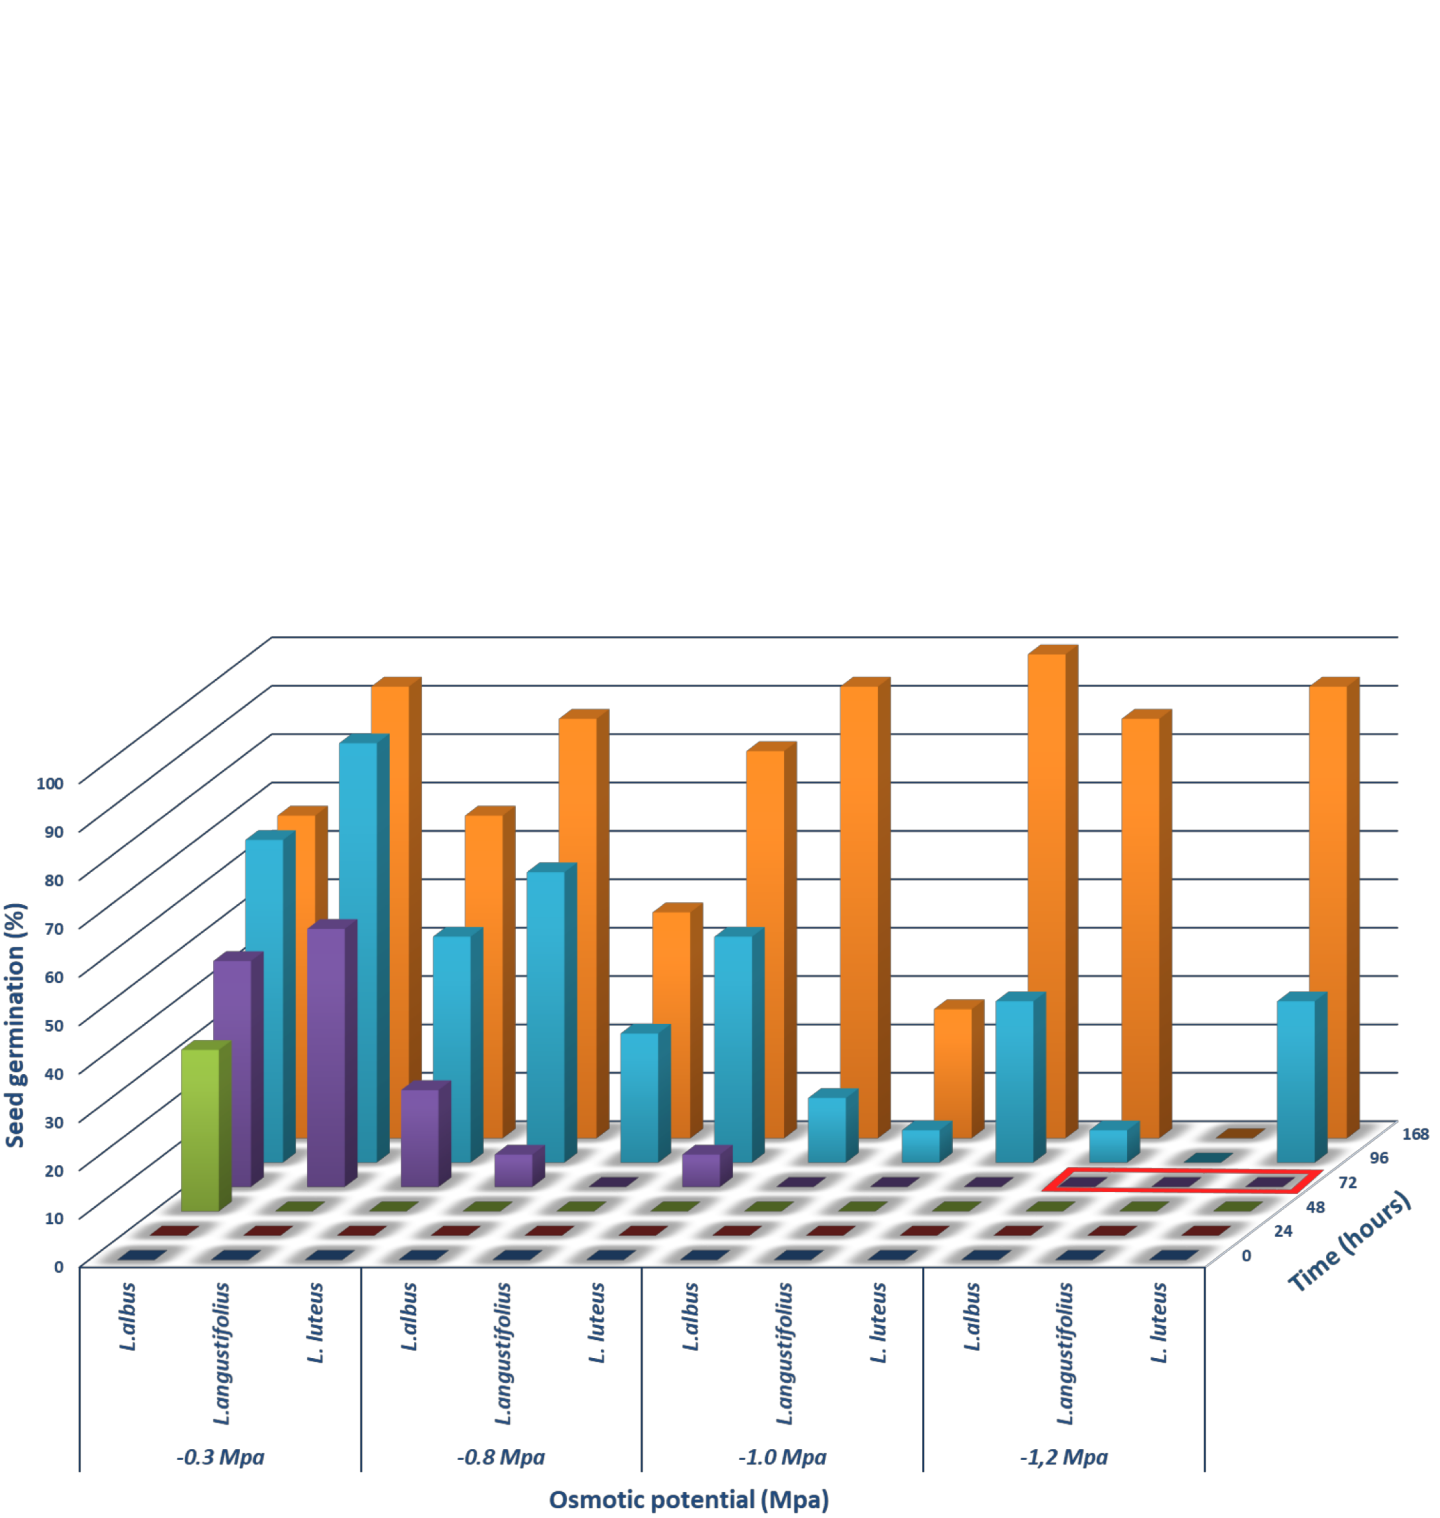

Supplement: s1 [file s1]
